# Supplementary material for: Association of Sociodemographic and Health-Related Factors With Receipt of Nondefinitive Therapy Among Younger Men With High-Risk Prostate Cancer
Source: PubMed Central journal article supplement (PMC7082722; doi:10.1001/jamanetworkopen.2020.1255), 2020-03-19

## Supplementary Online Content

Bagley AF, Anscher MS, Choi S, et al. Association of sociodemographic and health-related factors with receipt of nondefinitive therapy among younger men with high-risk prostate cancer. *JAMA Netw Open*. 2020;3(3):e201255. doi:10.1001/jamanetworkopen.2020.1255

**eTable.** Univariate and Multivariate Regression Analyses for Factors Associated With Receipt of Definitive Local Therapy

**eFigure 1.** Number of Patients Treated at Individual Treatment Facilities

**eFigure 2.** Patterns of Treatment by Facility Type for All Patients and Uninsured Patients

**eFigure 3.** Person-Years of Life Lost Based on Insurance Status Among All Patients With High-Risk Prostate Cancer Aged 70 Years and Younger and Those Receiving Definitive Therapy

This supplementary material has been provided by the authors to give readers additional information about their work.

**eTable.** Univariate and Multivariate Regression Analyses for Factors Associated With Receipt of Definitive Local Therapy<sup>a</sup>

| Characteristic                  | Definitive Therapy |             |        |               |             |        |
|---------------------------------|--------------------|-------------|--------|---------------|-------------|--------|
|                                 | Univariate         |             |        | Multivariate  |             |        |
|                                 | OR                 | 95% CI      | P      | OR            | 95% CI      | P      |
| <b>Insurance Status</b>         |                    |             |        |               |             |        |
| Private insurance/managed care  | 1 (Reference)      |             |        | 1 (Reference) |             |        |
| Not Insured                     | 0.23               | 0.20 – 0.25 | <.0001 | 0.31          | 0.27 – 0.35 | <.0001 |
| Medicaid                        | 0.29               | 0.26 – 0.33 | <.0001 | 0.43          | 0.38 – 0.49 | <.0001 |
| Medicare                        | 0.72               | 0.67 – 0.76 | <.0001 | 0.82          | 0.76 – 0.89 | <.0001 |
| Other government                | 1.96               | 1.51 – 2.54 | <.0001 | 2.41          | 1.83 – 3.19 | <.0001 |
| <b>Income Level<sup>b</sup></b> |                    |             |        |               |             |        |
| \$63,000+                       | 1 (Reference)      |             |        | 1 (Reference) |             |        |
| \$48,000 - \$62,999             | 0.87               | 0.80 – 0.94 | 0.0005 | 0.87          | 0.79 – 0.96 | 0.006  |
| \$38,000 - \$47,999             | 0.69               | 0.64 – 0.75 | <.0001 | 0.75          | 0.67 – 0.83 | <.0001 |
| < \$38,000                      | 0.51               | 0.47 – 0.55 | <.0001 | 0.73          | 0.65 – 0.82 | <.0001 |
| <b>Race/Ethnicity</b>           |                    |             |        |               |             |        |
| White (Non-Hispanic)            | 1 (Reference)      |             |        | 1 (Reference) |             |        |
| Black                           | 0.44               | 0.41 – 0.47 | <.0001 | 0.59          | 0.55 – 0.64 | <.0001 |
| Hispanic/Spanish                | 0.50               | 0.45 – 0.57 | <.0001 | 0.74          | 0.65 – 0.84 | <.0001 |
| Asian                           | 0.73               | 0.59 – 0.90 | 0.003  | 0.88          | 0.71 – 1.09 | 0.23   |
| <b>Age, yrs</b>                 |                    |             |        |               |             |        |
| ≤ 60                            | 1 (Reference)      |             |        | 1 (Reference) |             |        |
| 61 – 65                         | 0.92               | 0.86 – 0.99 | 0.02   | 0.89          | 0.82 – 0.96 | 0.002  |
| 66 - 70                         | 0.87               | 0.81 – 0.93 | <.0001 | 0.81          | 0.74 – 0.89 | <.0001 |

|                                                             |               |             |        |               |             |        |
|-------------------------------------------------------------|---------------|-------------|--------|---------------|-------------|--------|
| <b>Population without high school degree, %<sup>c</sup></b> |               |             |        |               |             |        |
| < 7                                                         | 1 (Reference) |             |        | 1 (Reference) |             |        |
| 7 - 12.9                                                    | 0.96          | 0.88 – 1.04 | 0.30   | 1.09          | 0.99 – 1.20 | 0.09   |
| 13 - 20.9                                                   | 0.70          | 0.65 – 0.76 | <.0001 | 1.00          | 0.89 – 1.11 | 0.94   |
| > 21                                                        | 0.51          | 0.47 – 0.56 | <.0001 | 0.94          | 0.83 – 1.07 | 0.33   |
| <b>Clinical T-Stage</b>                                     |               |             |        |               |             |        |
| 1                                                           | 1 (Reference) |             |        | 1 (Reference) |             |        |
| 2                                                           | 1.32          | 1.24 – 1.42 | <.0001 | 1.29          | 1.21 – 1.39 | <.0001 |
| 3                                                           | 1.92          | 1.76 – 2.10 | <.0001 | 1.77          | 1.61 – 1.94 | <.0001 |
| 4                                                           | 0.31          | 0.27 – 0.37 | <.0001 | 0.31          | 0.26 – 0.37 | <.0001 |
|                                                             |               |             |        |               |             |        |
| <b>Charlson Comorbidity Index</b>                           |               |             |        |               |             |        |
| 0                                                           | 1 (Reference) |             |        | 1 (Reference) |             |        |
| 1                                                           | 1.14          | 1.05 – 1.24 | 0.002  | 1.20          | 1.10 – 1.32 | <.0001 |
| 2                                                           | 0.79          | 0.66 – 0.95 | 0.01   | 0.89          | 0.73 – 1.08 | 0.23   |
|                                                             |               |             |        |               |             |        |
| <b>Great Circle Distance (miles)</b>                        |               |             |        |               |             |        |
| 0 - 4.9                                                     | 1 (Reference) |             |        | 1 (Reference) |             |        |
| 5.0 - 11.4                                                  | 1.27          | 1.18 – 1.37 | <.0001 | 1.10          | 1.01 – 1.19 | 0.03   |
| 11.5 - 27.9                                                 | 1.50          | 1.39 – 1.63 | <.0001 | 1.16          | 1.07 – 1.27 | 0.0006 |
| > 28.0                                                      | 1.55          | 1.43 – 1.68 | <.0001 | 1.29          | 1.18 – 1.41 | <.0001 |
|                                                             |               |             |        |               |             |        |
| <b>Facility Type</b>                                        |               |             |        |               |             |        |
| Academic/Research Program                                   | 1 (Reference) |             |        | 1 (Reference) |             |        |
| Community Cancer Program                                    | 0.78          | 0.72 – 0.86 | <.0001 | 0.87          | 0.79 – 0.96 | 0.005  |
| Comprehensive Community Cancer Program                      | 1.74          | 1.63 – 1.86 | <.0001 | 1.72          | 1.61 – 1.85 | <.0001 |
| Integrated Network Cancer Program                           | 1.35          | 1.22 – 1.49 | <.0001 | 1.38          | 1.24 – 1.53 | <.0001 |
|                                                             |               |             |        |               |             |        |
| <b>Urban/Rural Group<sup>d</sup></b>                        |               |             |        |               |             |        |

|                |               |             |      |    |  |  |
|----------------|---------------|-------------|------|----|--|--|
| Metro Counties | 1 (Reference) |             |      | NI |  |  |
| Urban Counties | 1.06          | 0.98 – 1.15 | 0.14 |    |  |  |
| Rural Counties | 1.01          | 0.83 – 1.22 | 0.93 |    |  |  |

<sup>a</sup>A logistic regression model was used for univariate and multivariate analyses. NI, Not included

<sup>b</sup>Median household income for patient’s area of residence

<sup>c</sup>Percentage of adults in the patient’s zip code who did not graduate from high school

<sup>d</sup>Data estimated by population of patient’s county using data from 2013 published by United States Department of Agriculture Economic Research Service. Metropolitan represents counties in metropolitan areas with a population range of fewer than 250 000 to greater than 1 million; urban represents populations of 2500 to greater than 20 000, either adjacent or not adjacent to a metropolitan area; rural represents completely rural populations or areas with less than 2500 residents.

**eFigure 1.** Number of Patients Treated at Individual Treatment Facilities

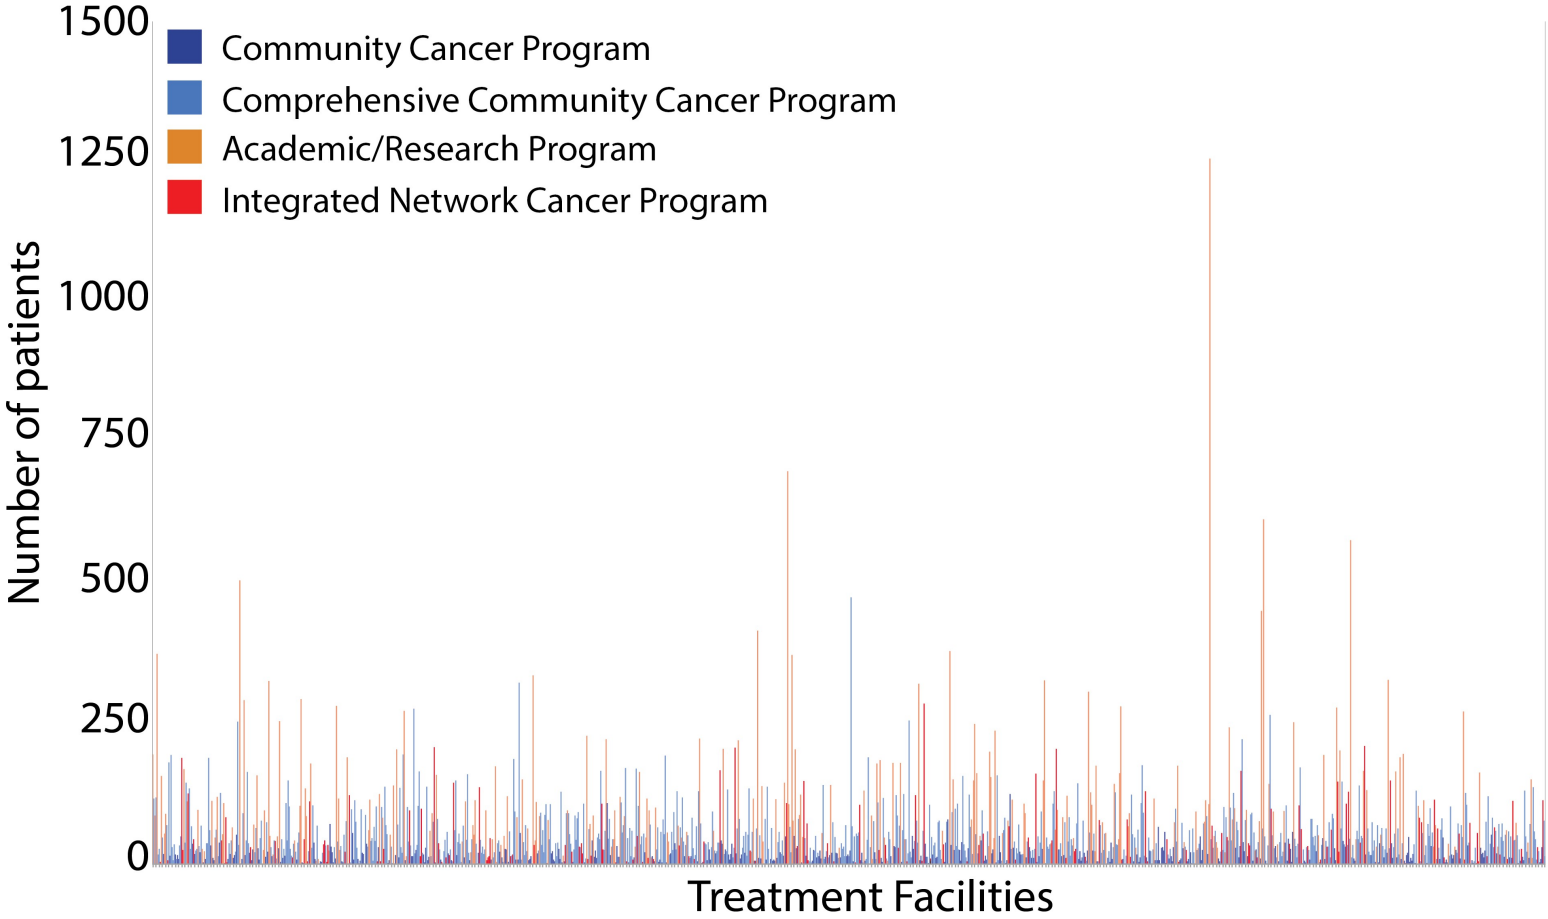

**eFigure 2.** Patterns of Treatment by Facility Type for (A,C) All Patients and (B,D) Uninsured Patients

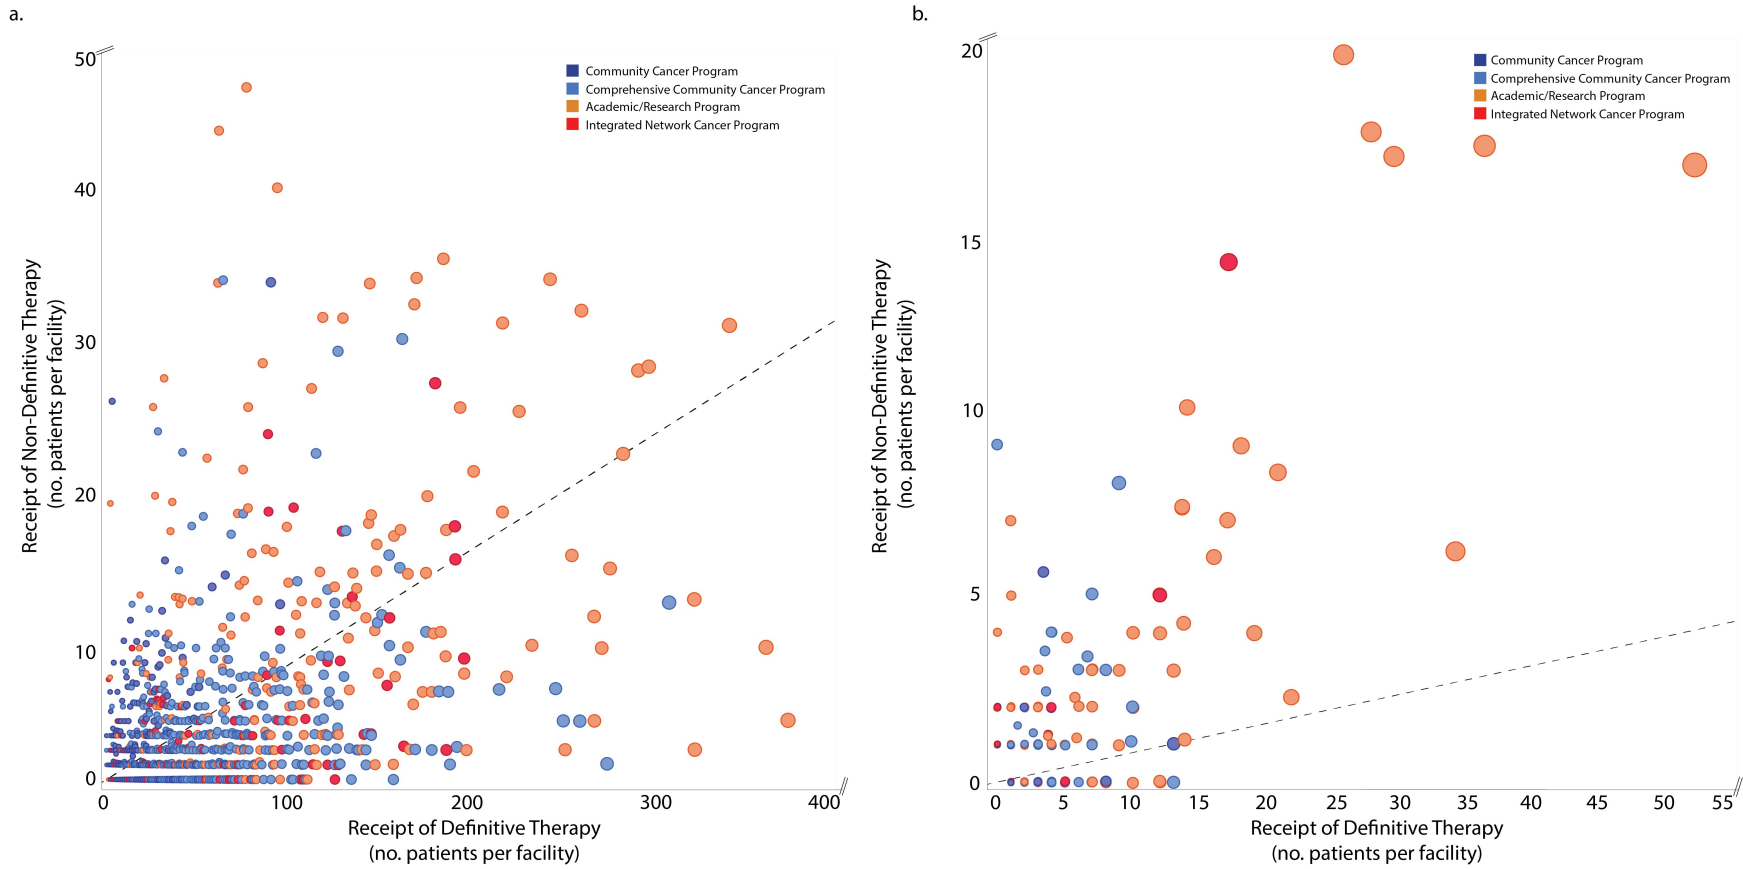

**eFigure 2. (Continued)** Patterns of Treatment by Facility Type for (A,C) All Patients and (B,D) Uninsured Patients

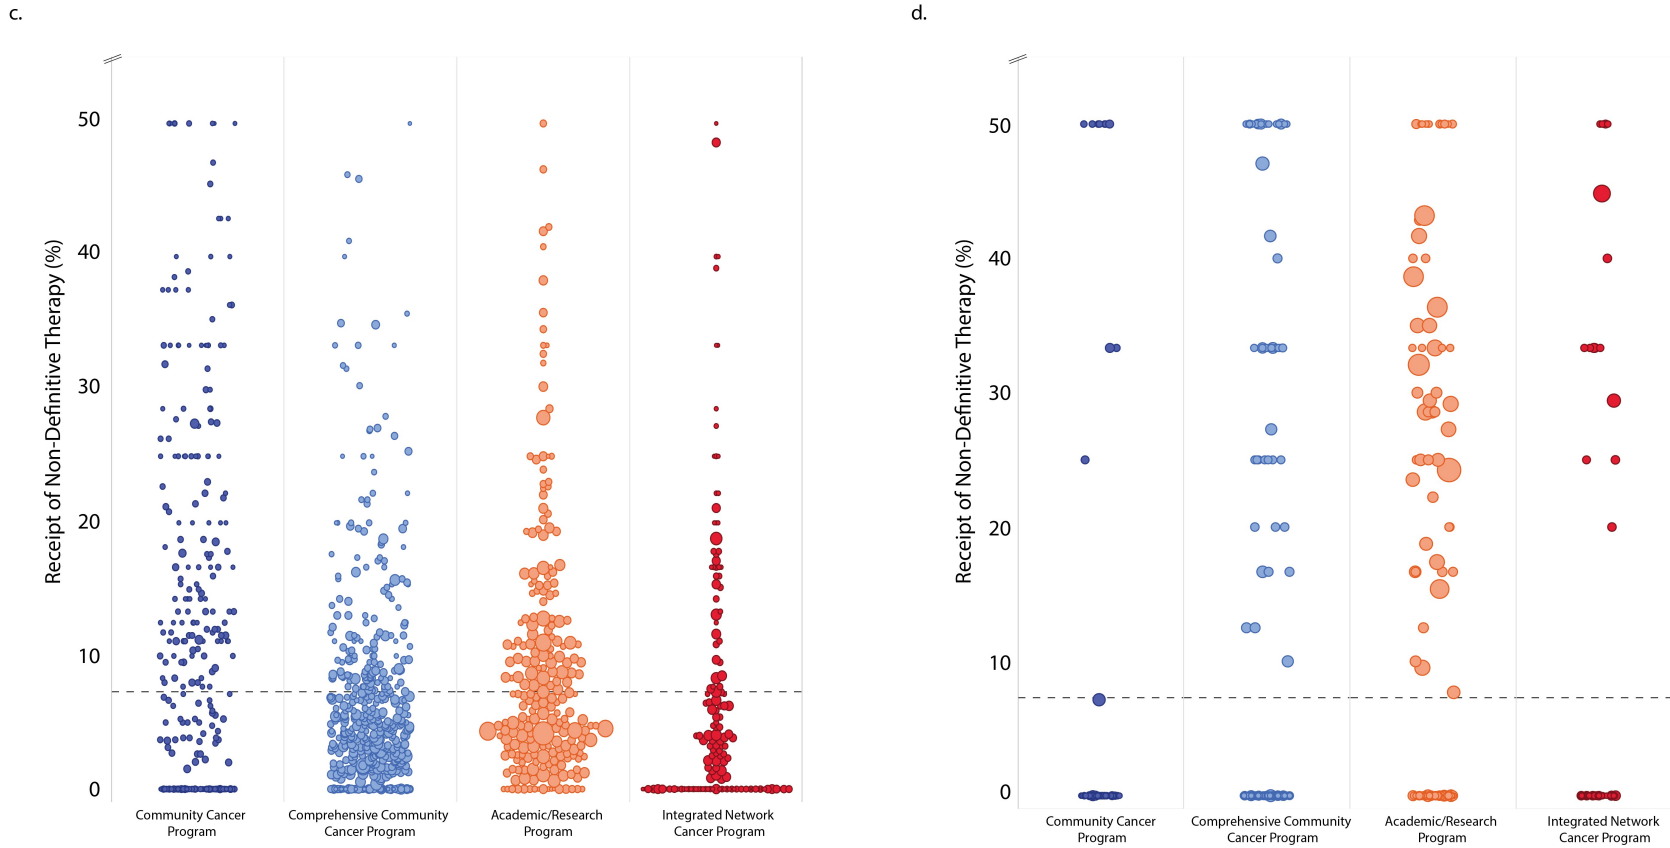

Symbols: Each circle represents an individual treatment facility; color of circle denotes treatment facility type; size of circle is proportional to total number of patients treated at facility; dashed line in (a) – (d) represents rate of non-definitive therapy in overall study population.

**eFigure 3.** Person-Years of Life Lost Based on Insurance Status Among (A) All Patients With High-Risk Prostate Cancer Aged 70 Years and Younger and (B) Those Receiving Definitive Therapy

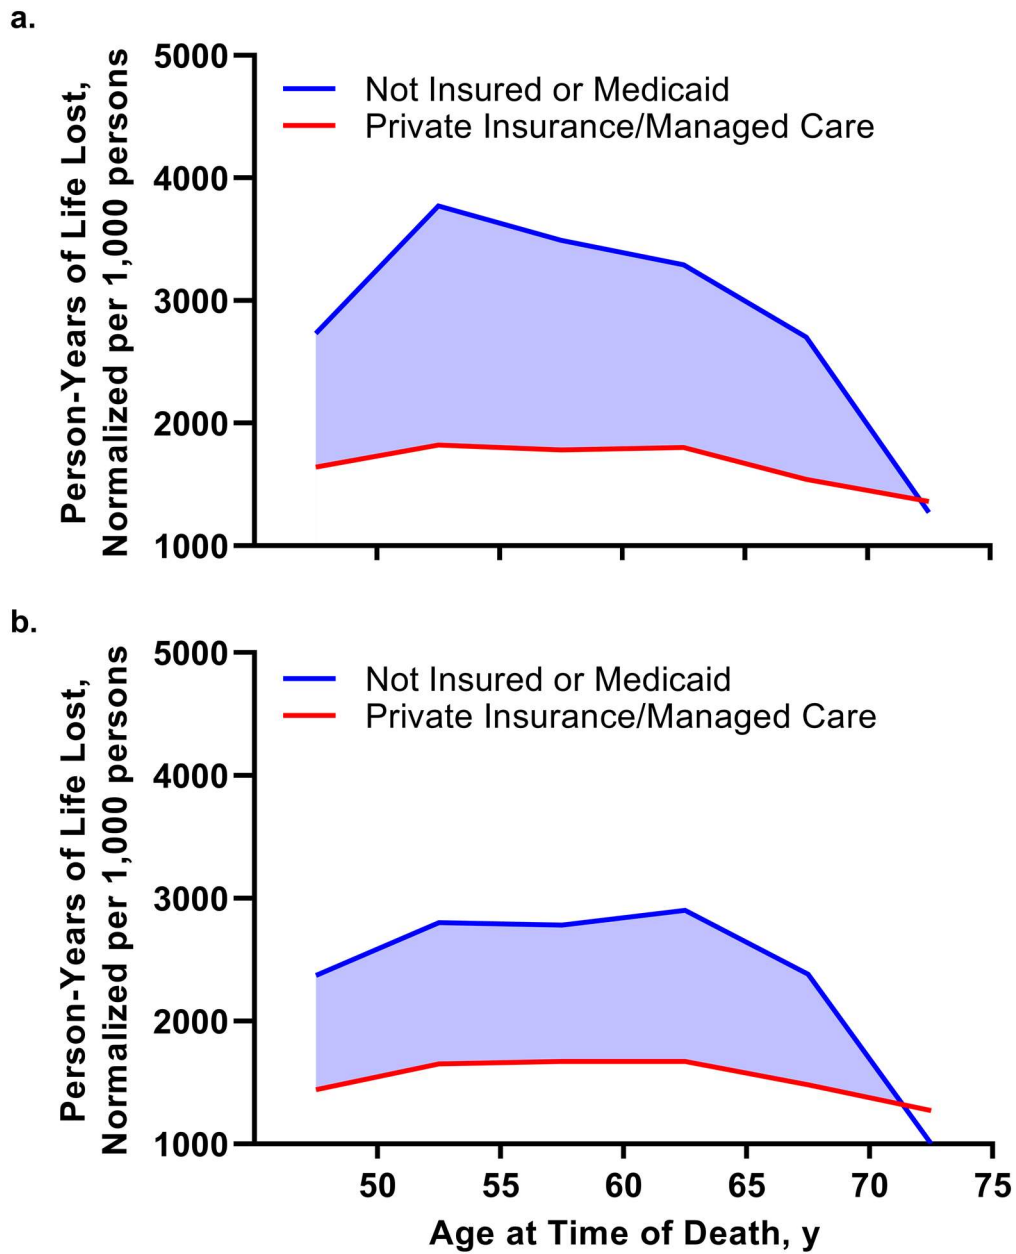

Supplement: jamanetwopen-3-e201255-s001.pdf [file jamanetwopen-3-e201255-s001.pdf]
